# Supplementary material
Source: MDPI journal article supplement (https://www.mdpi.com/1099-4300/23/6/699)

D. Romero-Bascones, M. Barrenechea, A. Murueta-Goyena, M. Galdós, J.C. Gómez-Esteban, I. Gabilondo, U. Ayala "Foveal pit morphology characterization: a quantitative analysis of the key methodological steps", Entropy 2021

This code implements the foveal pit mathematical model comparison (see sections 2.3.2 and 2.6.2 for details).

### Load dataset

```
% Prepare environment
close all;clc;clearvars;
addpath(genpath(' ../utils'));

% Pit Model list
pitModelList = horzcat({'none', 'Scheibe', 'Ding', 'Yadav', 'Breher', 'Dubis', 'Liu'}, ...
    combineCell('movAvg_',round(linspace(3,40,5))), ...
    combineCell('loess_',[1 2:50]));
nPitModel = length(pitModelList);

% Morphological parameter list
paramList = {'CFT', 'rimHeight', 'rimRadius', 'maxSlope'};
nParam = length(paramList);

% Load data
T = readtable('results_2.csv');
nSubject = size(T,1);
```

### Compute RMSE (all models)

```
RMSE = struct;
for iModel=1:nPitModel
    pitModel = pitModelList{iModel};

    % Raster RMSE
    varName = [pitModel '_raster_RMSE'];
    RMSE.(pitModel).raster.mean = mean(T.(varName));
    RMSE.(pitModel).raster.std = std(T.(varName));

    % Raster RMSE
    varName = [pitModel '_star_RMSE'];
    RMSE.(pitModel).star.mean = mean(T.(varName));
    RMSE.(pitModel).star.std = std(T.(varName));
end
```

### Compute ICC (all models)

```
% seed for reproducibility
rng(0);
```

```

% number of bootstraps
nBoot = 1e4; % (takes a while)

% empty matrix to store resampled ICC values
icc_boot = nan(nBoot,nParam,nPitModel);

for iBoot=1:nBoot
    indBoot = datasample(1:nSubject,nSubject);

    for iParam=1:nParam
        param = paramList{iParam};

        for iModel=1:nPitModel
            pitModel = pitModelList{iModel};

            % Raster bootstrap
            varName = [pitModel '_raster_' param];
            x1 = T.(varName);
            x1_boot = x1(indBoot);

            % Star bootstrap
            varName = [pitModel '_star_' param];
            x2 = T.(varName);
            x2_boot = x2(indBoot);

            icc_boot(iBoot,iParam,iModel) = ICC([x1_boot x2_boot], 'A-1');

        end
    end
end

% Empty struct to store all data
Icc = struct;

for iParam=1:nParam
    param = paramList{iParam};

    for iModel=1:nPitModel
        pitModel = pitModelList{iModel};

        % Compute mean and 95% CI
        Icc.(pitModel).(param).mean = mean(icc_boot(:,iParam,iModel));
        Icc.(pitModel).(param).lb = prctile(icc_boot(:,iParam,iModel),2.5);
        Icc.(pitModel).(param).ub = prctile(icc_boot(:,iParam,iModel),97.5);
    end
end

```

## Compute Bias

```

Bias = struct;

for iParam=1:nParam

```

```

param = paramList{iParam};

for n=1:nPitModel
    pitModel = pitModelList{n};

    % Bias in raster scans
    varName = [pitModel '_raster_' param '_bias'];
    Bias.(pitModel).(param).raster.mean = mean(T.(varName));
    Bias.(pitModel).(param).raster.std = std(T.(varName));

    % Bias in star scans
    varName = [pitModel '_star_' param '_bias'];
    Bias.(pitModel).(param).star.mean = mean(T.(varName));
    Bias.(pitModel).(param).star.std = std(T.(varName));
end
end

```

**Table 3a. Model comparison: fitting error (RMSE)**

```

% Reduced pit model list
pitModelList1 = {'none', 'Dubis', 'Ding', 'Scheibe', 'Liu', 'Yadav', 'Breher', 'loess_20', 'loess_200'};
nPitModel1 = length(pitModelList1);

rmse_mean = nan(nPitModel1-1,2);
rmse_std = nan(nPitModel1-1,2);
nDigit = 1;

for iModel=2:nPitModel1
    pitModel = pitModelList1{iModel};

    % Raster RMSE
    rmse_mean(iModel-1,1) = round(RMSE.(pitModel).raster.mean,nDigit);
    rmse_std(iModel-1,1) = round(RMSE.(pitModel).raster.std,nDigit);

    % Star RMSE
    rmse_mean(iModel-1,2) = round(RMSE.(pitModel).star.mean,nDigit);
    rmse_std(iModel-1,2) = round(RMSE.(pitModel).star.std,nDigit);
end

```

```

results = plus(plus(string(rmse_mean), ' ( '), plus(string(rmse_std), ' ) '));
T3_a = array2table([string(pitModelList1(2:end))' results'],'VariableNames',{'model','rmse_raster','rmse_star'});

```

T3\_a = 8×3 table

|   | model     | rmse_raster  | rmse_star    |
|---|-----------|--------------|--------------|
| 1 | "Dubis"   | "3.6 (0.7)"  | "4.1 (0.7)"  |
| 2 | "Ding"    | "5.3 (0.9)"  | "5.9 (0.9)"  |
| 3 | "Scheibe" | "2.6 (0.6)"  | "3.2 (0.6)"  |
| 4 | "Liu"     | "11.5 (2.7)" | "11.5 (2.7)" |
| 5 | "Yadav"   | "1.6 (0.3)"  | "2.5 (0.4)"  |
| 6 | "Breher"  | "2.9 (0.6)"  | "3.6 (1.3)"  |

|   | model      | rmse_raster | rmse_star   |
|---|------------|-------------|-------------|
| 7 | "loess_20" | "0.9 (0.1)" | "1.7 (0.3)" |
| 8 | "loess_50" | "5.9 (1.5)" | "6.5 (1.6)" |

**Table 3b. Absolute agreement (ICC)**

```
% Reduced pit model list
pitModelList1 = {'none', 'Dubis', 'Ding', 'Scheibe', 'Liu', 'Yadav', 'Breher', 'loess_20', 'loess_50'};
nPitModel1 = length(pitModelList1);

% empty matrix to store resampled ICC values
icc_mean = nan(nPitModel1,nParam);
icc_lb = nan(nPitModel1,nParam);
icc_ub = nan(nPitModel1,nParam);

nDigit = 3
```

```
nDigit = 3
```

```
for iParam=1:nParam
    param = paramList{iParam};

    for iModel=1:nPitModel1
        pitModel = pitModelList1{iModel};

        icc_mean(iModel,iParam) = round(Icc.(pitModel).(param).mean,nDigit);
        icc_lb(iModel,iParam) = round(Icc.(pitModel).(param).lb,nDigit);
        icc_ub(iModel,iParam) = round(Icc.(pitModel).(param).ub,nDigit);
    end
end

% Format results into table
results = plus(plus(plus(string(icc_mean), ' ['),plus(string(icc_lb), ',')),plus(string(icc_ub), '] '));
T3_b = array2table([string(pitModelList1)' results'],'VariableNames',{'model' paramList});
```

```
T3_b = 9x5 table
```

|   | model      | CFT         | rimHeight       | rimRadius       | maxSlope       |
|---|------------|-------------|-----------------|-----------------|----------------|
| 1 | "none"     | "0.976 ..." | "0.99 [0.98..." | "0.894 [0.8..." | "0.307 [0...." |
| 2 | "Dubis"    | "0.988 ..." | "0.995 [0.9..." | "0.949 [0.9..." | "0.968 [0...." |
| 3 | "Ding"     | "0.988 ..." | "0.995 [0.9..." | "0.957 [0.9..." | "0.969 [0...." |
| 4 | "Scheibe"  | "0.976 ..." | "0.995 [0.9..." | "0.949 [0.9..." | "0.956 [0...." |
| 5 | "Liu"      | "0.987 ..." | "0.994 [0.9..." | "0.961 [0.9..." | "0.959 [0...." |
| 6 | "Yadav"    | "0.976 ..." | "0.99 [0.98..." | "0.894 [0.8..." | "0.958 [0...." |
| 7 | "Breher"   | "0.986 ..." | "0.995 [0.9..." | "0.941 [0.9..." | "0.958 [0...." |
| 8 | "loess_20" | "0.985 ..." | "0.994 [0.9..." | "0.901 [0.8..." | "0.953 [0...." |
| 9 | "loess_50" | "0.989 ..." | "0.995 [0.9..." | "0.96 [0.94..." | "0.986 [0...." |

**Table 4. Model comparison: bias**

```

% Reduced pit model list
pitModelList1 = {'none','Dubis','Ding','Scheibe','Liu','Yadav','Breher','loess_20','loess_50'};
nPitModel1 = length(pitModelList1);

bias_mean = nan(nPitModel1,nParam*2);
bias_std = nan(nPitModel1,nParam*2);
nDigit = 1;

for iParam=1:nParam
    param = paramList{iParam};
    ind = 2*iParam-1;

    for n=1:nPitModel1
        pitModel = pitModelList1{n};

        % Bias in raster scans
        bias_mean(n,ind) = round(Bias.(pitModel).(param).raster.mean,nDigit);
        bias_std(n,ind) = round(Bias.(pitModel).(param).raster.std,nDigit);

        % Bias in star scans
        bias_mean(n,ind+1) = round(Bias.(pitModel).(param).star.mean,nDigit);
        bias_std(n,ind+1) = round(Bias.(pitModel).(param).star.std,nDigit);
    end
end

results = plus(plus(string(bias_mean),' ( '),plus(string(bias_std),' )'));

T4 = array2table([string(pitModelList1)' results'],'VariableNames',...
    {'model','CFT_raster','CFT_star','rimHeight_raster','rimHeight_star',...
    'rimRadius_raster','rimRadius_star','maxSlope_raster','maxSlope_star'})

```

T4 = 9×9 table

...

|   | model      | CFT_raster   | CFT_star     | rimHeight_raster | rimHeight_star |
|---|------------|--------------|--------------|------------------|----------------|
| 1 | "none"     | "0 (0)"      | "0 (0)"      | "0 (0)"          | "0 (0)"        |
| 2 | "Dubis"    | "1.3 (1.3)"  | "1.4 (1.9)"  | "-0.2 (0.2)"     | "-0.5 (0.3)"   |
| 3 | "Ding"     | "1.1 (1.4)"  | "1.2 (2.1)"  | "-0.5 (0.3)"     | "-0.8 (0.3)"   |
| 4 | "Scheibe"  | "0 (0)"      | "0 (0)"      | "-0.1 (0.3)"     | "-0.3 (0.3)"   |
| 5 | "Liu"      | "-1.1 (1.2)" | "-1.1 (1.8)" | "-3.6 (0.9)"     | "-3.9 (0.9)"   |
| 6 | "Yadav"    | "0 (0)"      | "0 (0)"      | "0 (0)"          | "0 (0)"        |
| 7 | "Breher"   | "0.8 (1.1)"  | "0.9 (1.8)"  | "-0.4 (0.2)"     | "-0.6 (0.2)"   |
| 8 | "loess_20" | "0.3 (0.5)"  | "0.4 (1.2)"  | "-0.1 (0)"       | "-0.4 (0.1)"   |
| 9 | "loess_50" | "6 (2.7)"    | "6.6 (3.3)"  | "-0.3 (0.3)"     | "-0.5 (0.3)"   |

## Figure S1. Visualize ICC Agreement (without models)

```
f = figure;

colors1 = [0 0 1; 1 0 0; 0 1 0; 0 0 0];

for n=1:nParam
    param = paramList{n};

    % Raster
    varName = ['none_raster_' param];
    x = T.(varName);

    % Star
    varName = ['none_star_' param];
    y = T.(varName);

    % Generate scatterplot
    subplot(2,2,n);hold on;

    scatter(x,y,'filled','MarkerFaceColor',colors1(n,:), 'MarkerFaceAlpha',0.3);

    lims = [min([x; y]) max([x; y])];
    plot(lims,lims,'--','Color',colors1(n,:), 'LineWidth',1.5);

    xlim(lims);
    ylim(lims);
    grid on;

    xlabel('raster');
    ylabel('star');
    title({param,['ICC=' num2str(round(Icc.none.(param).mean,2))]},'Interpreter','none');
    set(gca,'FontSize',12);
    daspect([1 1 1]);
end
set(f,'position',[0 0 800 700]);
```

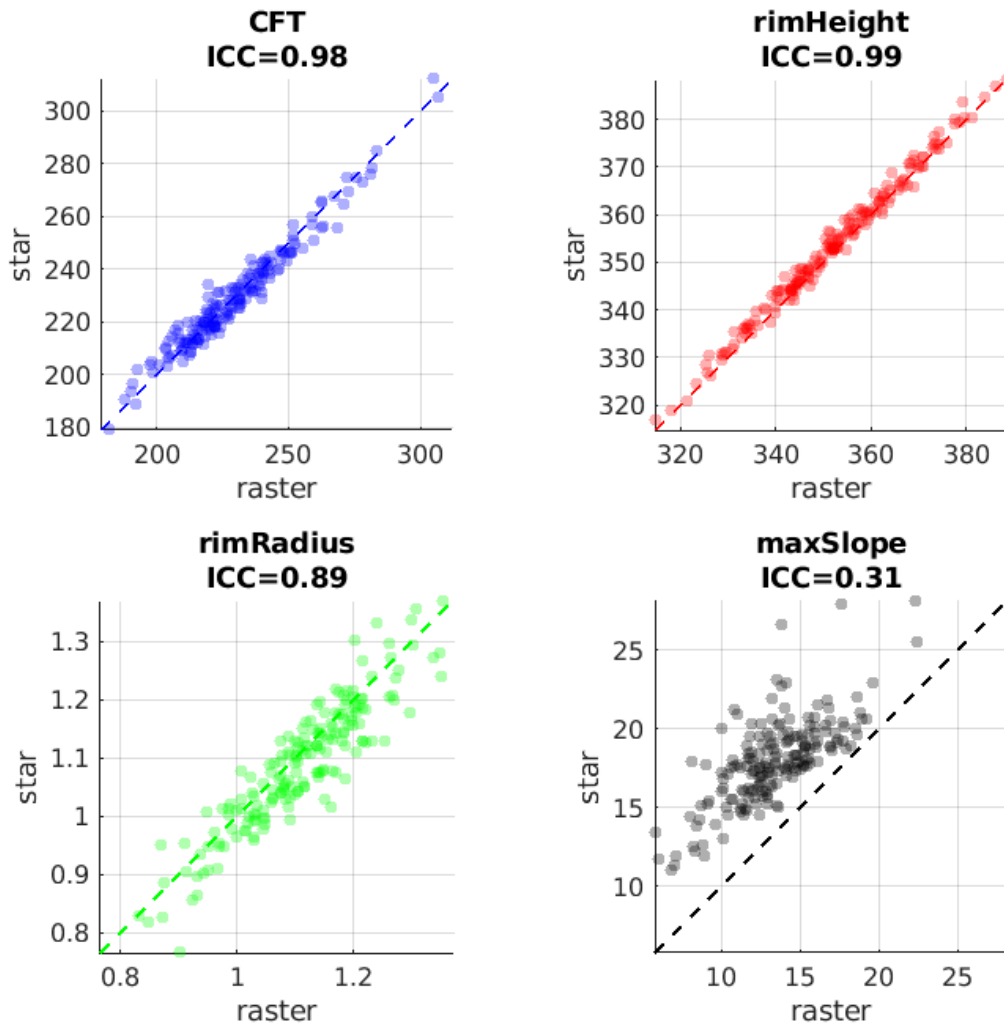

**Figure 5. ICC vs bias (raster)**

```
f = figure;

% Reduced model list
pitModelList2 = {'none', 'Dubis', 'Ding', 'Scheibe', 'Liu', 'Yadav', 'Breher'};
nPitModel2 = length(pitModelList2);

% Reduced param list
paramList1 = {'rimRadius', 'maxSlope'};
nParam1 = length(paramList1);

% Plotting options
colors2 = [0 0 255; 0 227 255; 178 4 248; 65 198 0; 244 133 61; 255 26 185; 255 0 0]./255;
marker = {'o', 'diamond', '*', '+', '^', 'x', 'square'};

scanType = 'raster';

for iParam=1:nParam1
    param = paramList1{iParam};
```

```

subplot(1,2,iParam);hold on;

% -----LOESS-----
% Merge loess data from different spans
spanMax = 50;

loess_bias = nan(1,spanMax);
loess_icc = nan(1,spanMax);
for span=1:spanMax
    pitModel = ['loess_' num2str(span)];

    loess_bias(span) = Bias.(pitModel).(param).(scanType).mean;
    loess_icc(span) = Icc.(pitModel).(param).mean;
end

% Plot loess curve
plot(loess_bias,loess_icc,'--','Color','black','LineWidth',3,'MarkerIndices',1:20);

% Plot markers in 5% steps
step = 5;
if iParam==1
    scatter(loess_bias(15:step:end),loess_icc(15:step:end),80,'black','LineWidth',2)
else
    scatter(loess_bias(5:step:end),loess_icc(5:step:end),80,'black','LineWidth',2.5)
end

% -----MATHEMATICAL MODELS -----
for n=1:nPitModel2
    pitModel = pitModelList2{n};

    % Get ICC
    icc_val = Icc.(pitModel).(param).mean;

    % Get Bias
    bias_val = Bias.(pitModel).(param).(scanType).mean;

    % Plotting
    scatter(bias_val,icc_val,450,marker{n},'filled','MarkerFaceColor',[1 1 1],'Mark
end

% ----- POLISH THE FIGURE -----
% Adjust axes
if iParam==1
    xlim([-9 3]);xticks(-9:3);
    ylim([0.89 1]);yticks(linspace(0.89,1,12))
else
    xlim([-30 0]);xticks(-30:3:0);
    ylim([0.3 1]);yticks(linspace(0.3,1,8))
end

title(param);
grid on;

```



```

xlabel('Bias (%)');
ylabel('ICC');
set(gca,'FontSize',14);
box on;
if iParam==2
    legend([{'LOESS'} pitModelList2], 'position',[0.572 0.26 0.1 0.2], 'FontSize',18);
end

end

set(f,'position',[0 0 1800 500]);
suptitle('Fig. 5 Bias vs ICC (raster)');

```

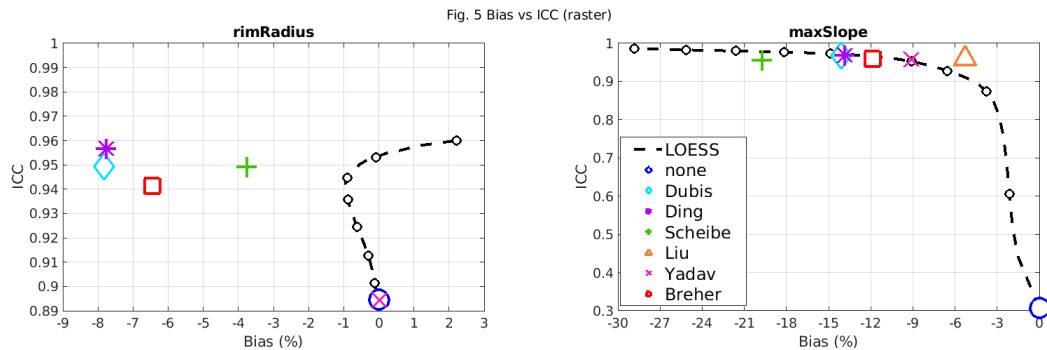

**Figure S3. ICC vs bias (star)**

```

f = figure;

% Reduced model list
pitModelList2 = {'none', 'Dubis', 'Ding', 'Scheibe', 'Liu', 'Yadav', 'Breher'};
nPitModel2 = length(pitModelList2);

% Reduced param list
paramList1 = {'rimRadius', 'maxSlope'};
nParam1 = length(paramList1);

% Plotting options
colors2 = [0 0 255;0 227 255;178 4 248;65 198 0;244 133 61;255 26 185;255 0 0]./255;
marker = {'o', 'diamond', '*', '+', '^', 'x', 'square'};

scanType = 'star';

for iParam=1:nParam1
    param = paramList1{iParam};

    subplot(1,2,iParam);hold on;

    % -----LOESS-----
    % Merge loess data from different spans
    spanMax = 50;

    loess_bias = nan(1,spanMax);
    loess_icc = nan(1,spanMax);
    for span=1:spanMax

```

```

        pitModel = ['loess_' num2str(span)];

        loess_bias(span) = Bias.(pitModel).(param).(scanType).mean;
        loess_icc(span) = Icc.(pitModel).(param).mean;
    end

    % Plot loess curve
    plot(loess_bias,loess_icc,'--','Color','black','LineWidth',3,'MarkerIndices',1:20);

    % Plot markers in 5% steps
    step = 5;
    if iParam==1
        scatter(loess_bias(15:step:end),loess_icc(15:step:end),80,'black','LineWidth',2)
    else
        scatter(loess_bias(5:step:end),loess_icc(5:step:end),80,'black','LineWidth',2.5)
    end

    % -----MATHEMATICAL MODELS -----
    for n=1:nPitModel2
        pitModel = pitModelList2{n};

        % Get ICC
        icc_val = Icc.(pitModel).(param).mean;

        % Get Bias
        bias_val = Bias.(pitModel).(param).(scanType).mean;

        % Plotting
        scatter(bias_val,icc_val,450,marker{n},'filled','MarkerFaceColor',[1 1 1],'Mark
    end

    % Adjust axes
    if iParam==1
        xlim([-9 3]);xticks(-9:3);
        ylim([0.89 1]);yticks(linspace(0.89,1,12))
    else
        xlim([-48 0]);xticks(-48:4:0);
        ylim([0.3 1]);yticks(linspace(0.3,1,8))
    end

    title(param);
    grid on;
    xlabel('Bias (%)');
    ylabel('ICC');
    set(gca,'FontSize',14);
    box on;
    if iParam==2
        legend(['{LOESS}' pitModelList2],'position',[0.825 0.45 0.08 0.4],'FontSize',16)
    end
end

set(f,'position',[0 0 1800 500]);
suptitle('Fig. S3 Bias vs ICC (star)');

```

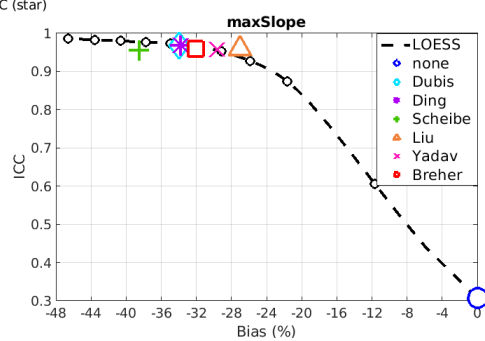

Supplement: s1 [file s1]
