# Supplementary material
Source: MDPI journal article supplement (https://www.mdpi.com/1099-4300/23/6/699)
Supplement: s1 [file s1]

## Supplementary figures

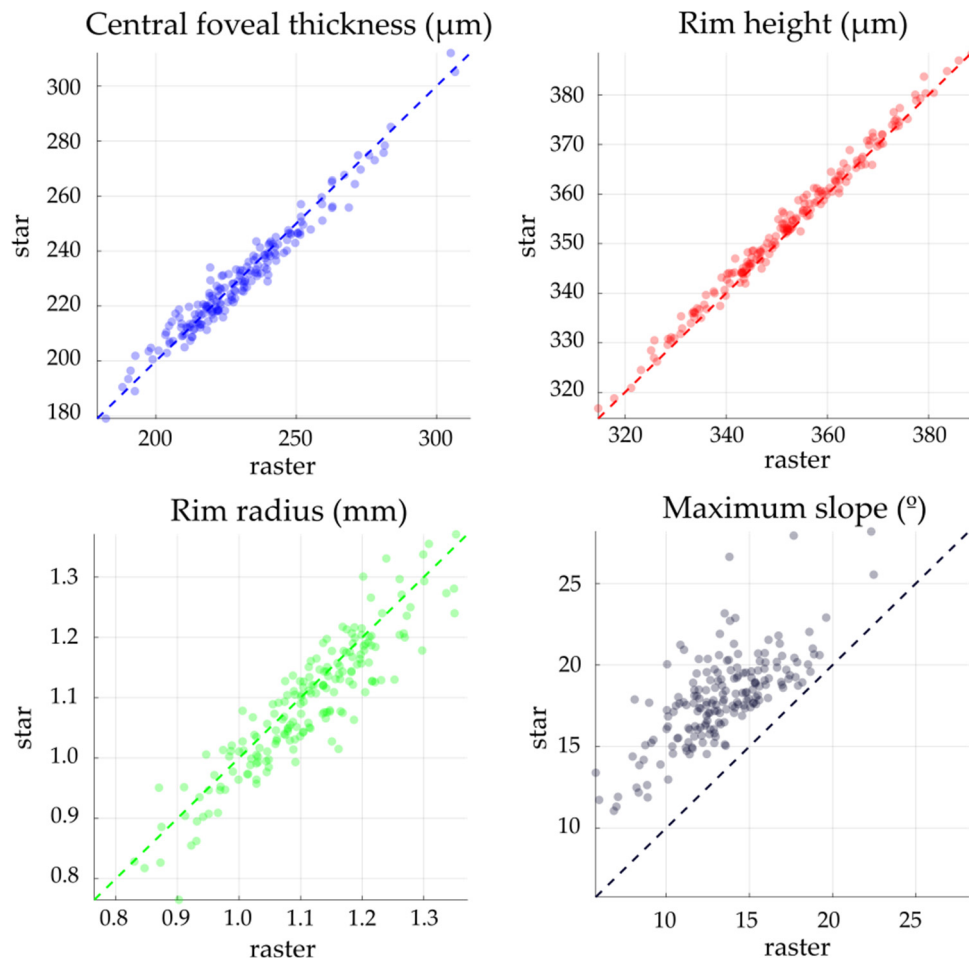

**Figure S1** Scatterplot of raster vs. star estimation of each parameter without using any model for central foveal thickness, rim height, rim radius and maximum slope.

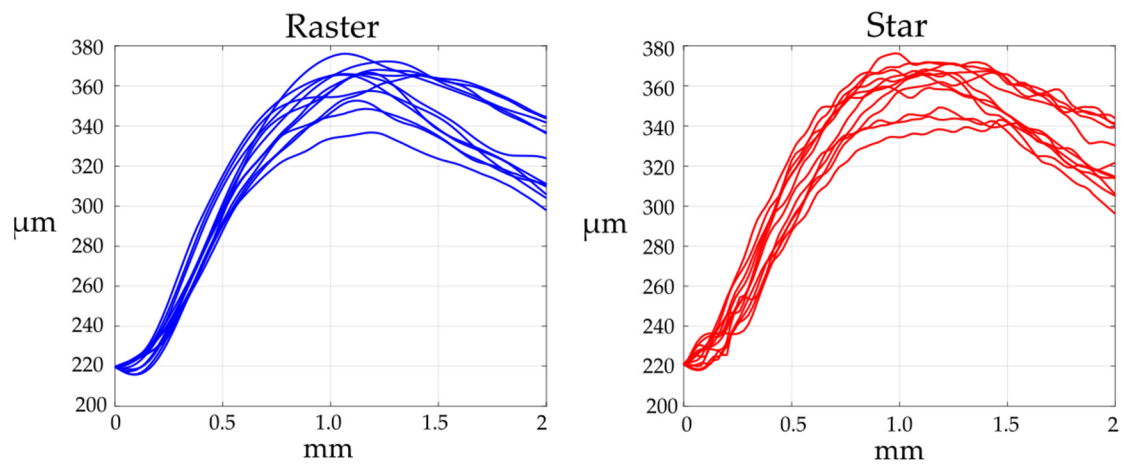

**Figure S2** Raw total retinal thickness curves of the same eye obtained from raster and star acquisition protocols.

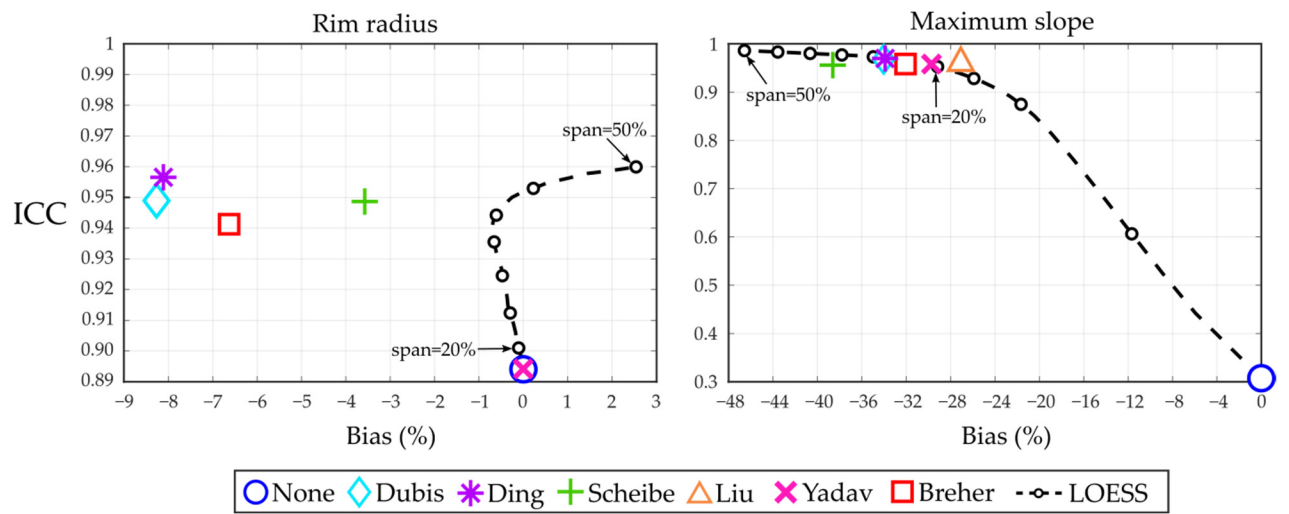

**Figure S3** Intraclass correlation coefficient (ICC) as a function of the introduced bias in star scans for **(a)** rim radius and **(b)** maximum slope. Small circular markers in locally estimated scatterplot smoothing (LOESS) are shown in 5% span steps.
