# Supplementary material
Source: MDPI journal article supplement (https://www.mdpi.com/1099-4300/23/6/699)
Supplement: s1 [file s1]

D. Romero-Bascones, M. Barrenechea, A. Murueta-Goyena, M. Galdós, J.C. Gómez-Esteban, I. Gabilondo, U. Ayala "Foveal pit morphology characterization: a quantitative analysis of the key methodological steps", Entropy 2021

This code implements the foveal center location method comparison (see sections 2.3.1 and 2.6.1 for details).

## Load data

```
% Prepare environment
close all;clc;clearvars;
addpath(genpath('..\/utils'));

% List of foveal center location methods to be compared
alignMethodList = {'none','min','resample_min','smooth_min'};
nAlignMethod = length(alignMethodList);

% Define plotting colors
colors = [99 151 243;126 95 241;136 236 0;224 105 165]./255;

% Load dissimilarity measurements
T = readtable('results_1.csv');

% Merge data into a single matrix (without subject ID)
D = T{:,2:end};
```

## Normality check

```
f = figure;
set(f,'position',[0 0 1300 800]);

for i=1:nAlignMethod
    alignMethod = alignMethodList{i};

    % Plot histograms
    subplot(nAlignMethod,2,2*i-1);
    histogram(D(:,i),'BinEdges',linspace(0,15,50),'FaceColor',colors(i,:));
    xlabel('mean TRT difference (\mum)');hold on;grid on;

    % Saphiro-Wilk test
    mx = mean(D(:,i));
    sdX = std(D(:,i));
    x = (D(:,i)-mx)/sdX;
    [~,p2] = swtest(x);
    title(['Fovea location method: ' alignMethod],['Saphiro-Wilk p:' num2str(round(p2,2))]);

    % QQ Plot
    subplot(nAlignMethod,2,2*i);
    qqplot(D(:,i));grid on;
```

end

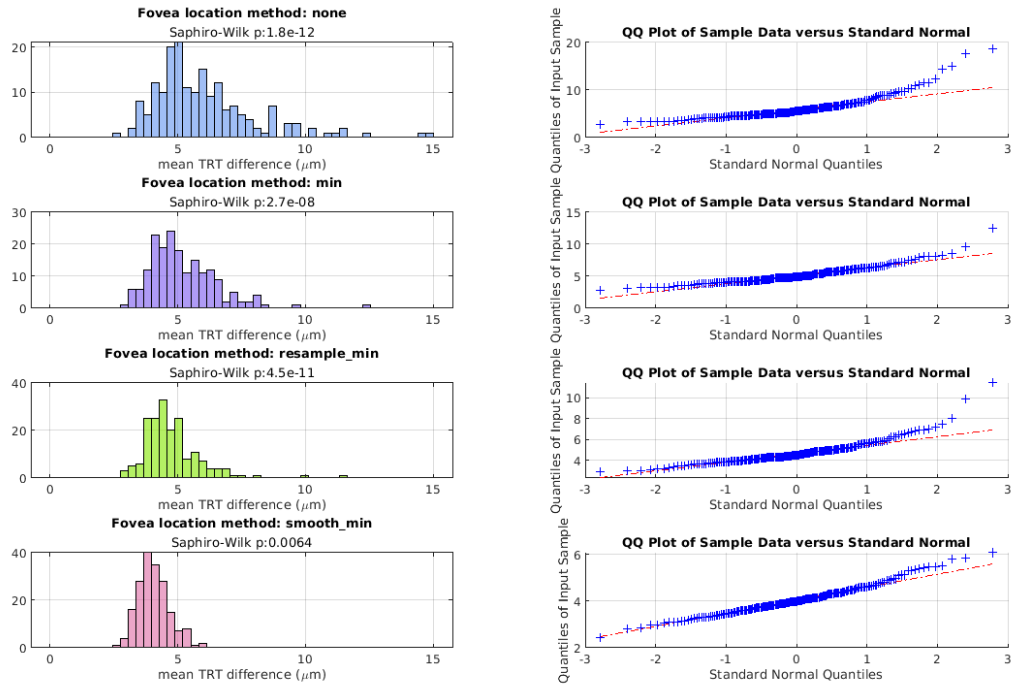

Data can not be considered to be normal

## Summary statistics

```
varNames = {'Method', 'mean', 'median', 'prctile25', 'prctile75', 'std', 'iqr'};

% Create a table with summary statistics
table(alignedMethodList', mean(D)', median(D)', prctile(D,25)', prctile(D,75)', std(D)',

ans = 4x7 table
```

|   | Method         | mean   | median | prctile25 | prctile75 | std    | iqr    |
|---|----------------|--------|--------|-----------|-----------|--------|--------|
| 1 | 'none'         | 6.1629 | 5.5866 | 4.6724    | 6.9430    | 2.3793 | 2.2706 |
| 2 | 'min'          | 5.1959 | 4.9090 | 4.2263    | 5.8938    | 1.3158 | 1.6675 |
| 3 | 'resample_min' | 4.7580 | 4.5252 | 4.0497    | 5.1584    | 1.1027 | 1.1087 |
| 4 | 'smooth_min'   | 4.0602 | 3.9961 | 3.6506    | 4.4087    | 0.6246 | 0.7581 |

## Figure 3: Visual comparison (violinplot)

```
f = figure;
V = violinplot(D);
hold on;
for i=1:nAlignMethod
    V(i).ViolinColor = colors(i,:);
    V(i).EdgeColor = colors(i,:);
end
```

```
ylim([0 20]);
ylabel('D_{align} (\mu m)');
title('Foveal center location method comparison');
xticklabels(alignMethodList);set(gca,'ticklabelinterpreter','none');grid on;
set(gca,'FontSize',16);
set(f,'position',[0,0,900,600]);
box on;
```

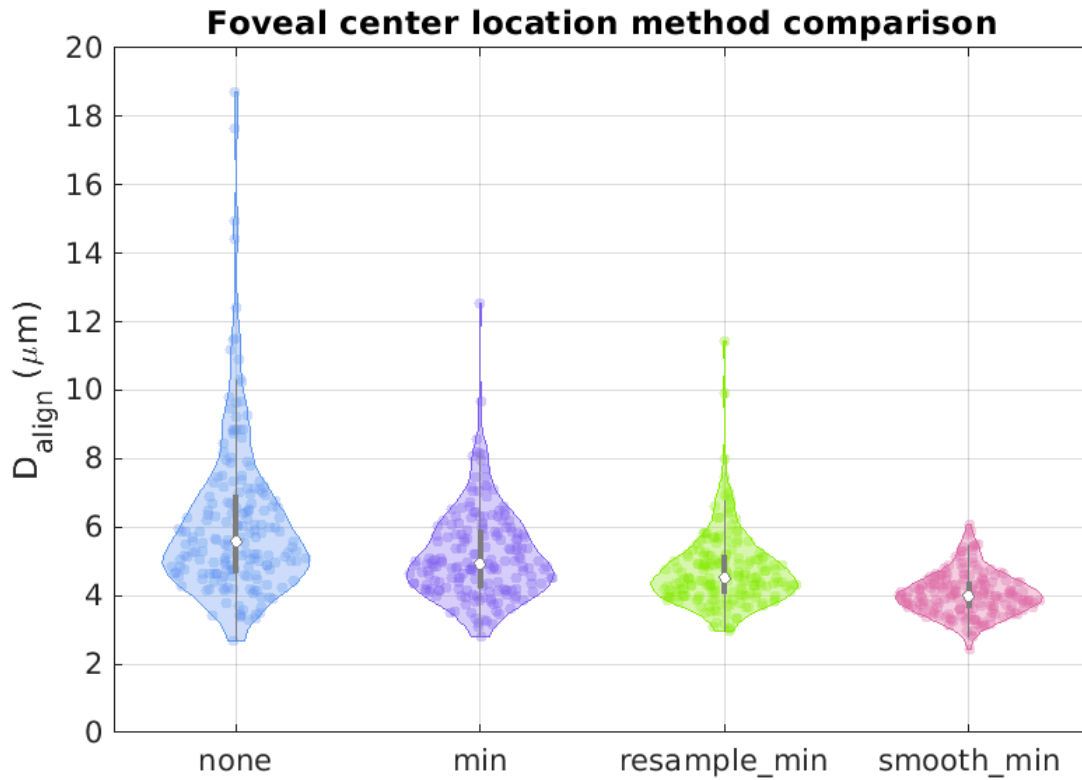

## Inferential statistics

```
% Groupwise comparison
p = kruskalwallis(D,alignMethodList,'off');
disp(['Groupwise compraison: Kruskal-Wallis test p=' num2str(p)]);
```

Groupwise compraison: Kruskal-Wallis test p=4.4452e-42

```
% Pairwise comparison
% smooth_min vs min
p = ranksum(D(:,2),D(:,4));
disp(['Min vs smooth_min: Mann-Whitney U test p=' num2str(p)]);
```

Min vs smooth\_min: Mann-Whitney U test p=3.4482e-23

```
% smooth_min vs resample_min
p = ranksum(D(:,3),D(:,4));
```

```
disp(['Resample_min vs smooth_min: Mann-Whitney U test p=' num2str(p)]);
```

```
Resample_min vs smooth_min: Mann-Whitney U test p=2.7387e-13
```
